# Supplementary material for: Screen-Printed Wearable Sweat Sensor for Cost-Effective Assessment of Human Hydration Status through Potassium and Sodium Ion Detection
Source: MDPI journal article supplement (doi:10.3390/mi14081497), 2023-07-26
Supplement: s1 [file s1]

# Screen-Printed Wearable Sweat Sensor for Cost-Effective Assessment of Human Hydration Status through Potassium and Sodium Ion Detection

Mingpeng Yang <sup>1,2,\*</sup>, Nan Sun <sup>1</sup>, Xiaochen Lai <sup>1,2</sup>, Yanjie Li <sup>1</sup>, Xingqiang Zhao <sup>1,2</sup>, Jiamin Wu <sup>3</sup> and Wangping Zhou <sup>1,2,\*</sup>

<sup>1</sup> School of Automation, Nanjing University of Information Science and Technology, 219 Ningliu Road, Nanjing 210044, China; sunnan6047@163.com (N.S.); xchlai@nuist.edu.cn (X.L.); xx761563423@gmail.com (Y.L.); zxq8562@163.com (X.Z.)

<sup>2</sup> Jiangsu Collaborative Innovation Centre on Atmospheric Environment and Equipment Technology, Nanjing University of Information Science and Technology, 219 Ningliu Road, Nanjing 210044, China

<sup>3</sup> Nanjing NARI Information and Communication Technology, Co., Ltd., 19 Chengxin Road, Nanjing 211106, China; wjm19920727@163.com

\* Correspondence: mpyang@mail.ustc.edu.cn (M.Y.); wpzhou@nuist.edu.cn (W.Z.);  
Tel.: +86-17826058209 (M.Y.); +86-18951997253 (W.Z.)



printed substrate electrodes: I-substrate electrode for  $K^+$  ISE, II-substrate electrode for  $Na^+$  ISE, III-substrate electrode for RE, IV-insulating layer.

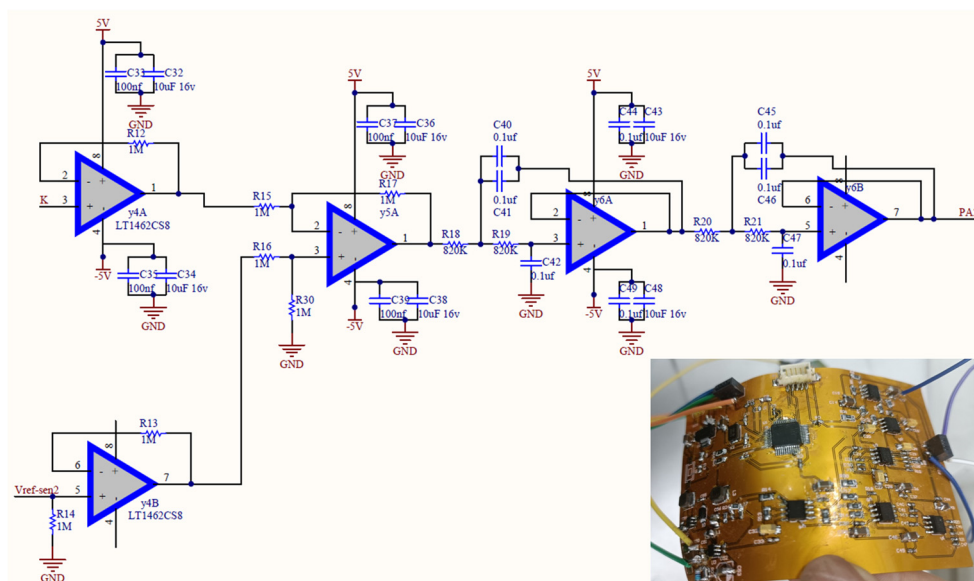

**Figure S2.** Signal conditioning circuit and the physical representation of the FPCB for the sensor.

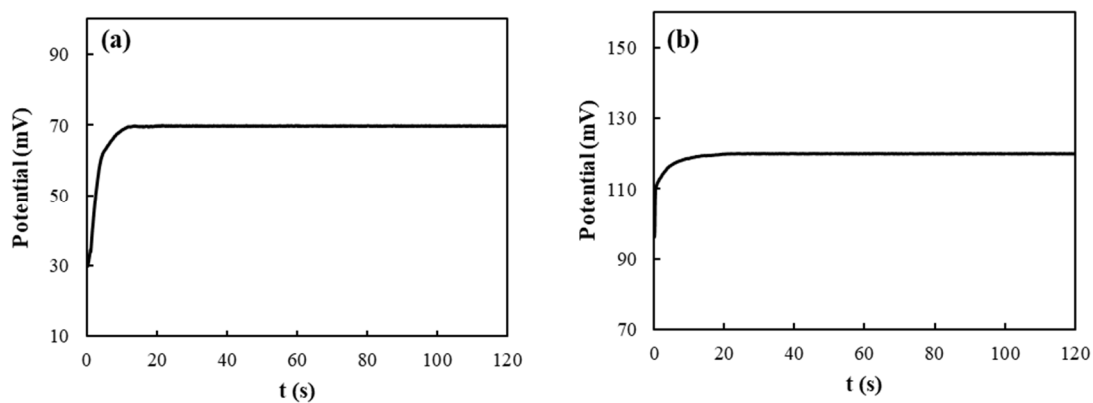

**Figure S3.** Open Circuit Potential (OCP) vs. time curves for the (a)  $K^+$  ISE and (b)  $Na^+$  ISE of the sensor, illustrating the temporal variation of OCP values from the initial unstable state to the gradual stabilization. The two electrodes were immersed individually in a 50 mL solution of 2 mM KCl and a 50 mL solution of 10 mM NaCl, respectively.

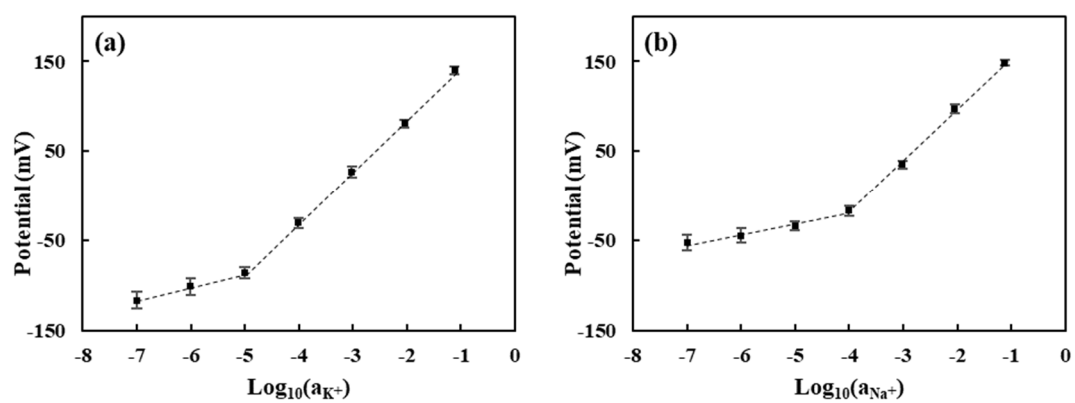

**Figure S4.** Calibration curves with an extended concentration range (from  $10^{-7}$  to  $10^{-1}$  mol L<sup>-1</sup>) for (a) K<sup>+</sup> ISE and (b) Na<sup>+</sup> ISE of the sensor.
